# Supplementary material for: Ferric citrate and ferric EDTA but not ferrous sulfate drive amphiregulin-mediated activation of the MAP kinase ERK in gut epithelial cancer cells
Source: PubMed Central journal article supplement (PMC5908306; doi:10.18632/oncotarget.24899), 2018-03-30
Supplement: oncotarget-09-17066-s001.pdf [file oncotarget-09-17066-s001.pdf]

## Ferric citrate and ferric EDTA but not ferrous sulfate drive amphiregulin-mediated activation of the MAP kinase ERK in gut epithelial cancer cells

### SUPPLEMENTARY MATERIALS

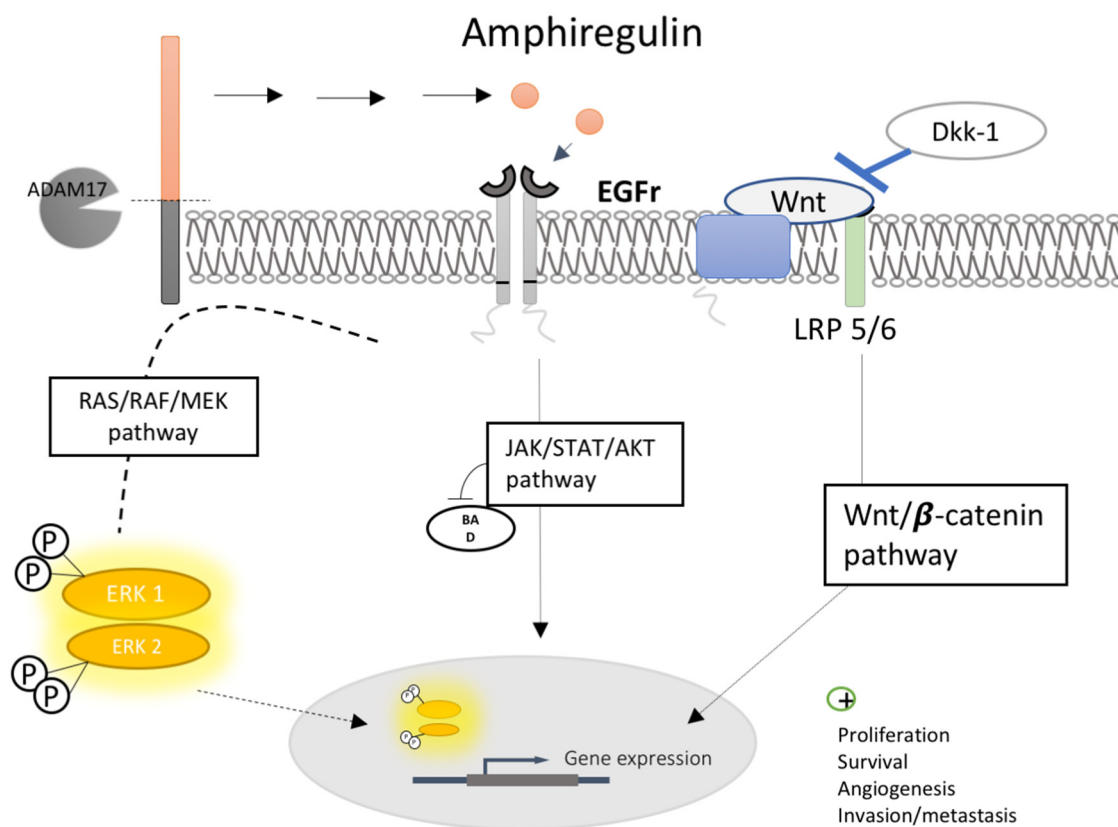

Supplementary Figure 1: Overview of amphiregulin activation of the MAP kinase pathway.
